# Supplementary material
Source: HighWire-hosted journal article supplement (https://www.ijssurgery.com/content/18/1/62)
Supplement: inline-supplementary-material-1 [file inline-supplementary-material-1.docx]

| **Supplementary Table 1. ICD-10 Codes Used to Extract Our Study Population** | |
| --- | --- |
| **Diagnosis** | **ICD-10 Codes** |
| Ankylosing spondylitis | M45.0, M45.1, M45.2, M45.3, M45.4, M45.5, M45.6, M45.07, M45.9 |
| Ankylosing Hyperostosis (DISH) | M48.10, M48.11, M48.12, M48.13, M48.14, M48.15, M48.16, M48.17, M48.19 |
| Cervical fractures and dislocations | S12.0(X), S12.1(X), S12.2X, S12.3(X), S12.4(X), S12.5(X), S12.6(X), S12.8(X), S12.9(X) |
| Thoracic fractures and dislocations | S22.00(x), S22.01(x), S22.02(x), S22.03(x), S22.04(x), S22.05(x), S22.06(x), S22.07(x), S22.08(x) |
| Lumbar fracture | S32.00(x), S32.01(X), S32.02(X), S32.03(X), S32.04(X), S32.05(X) |
| Spinal cord injury | S14(X), S24(X), S34(X) |
| Fusion | 0RG0070,0RG0071,0RG007J,0RG00A0,0RG00AJ,0RG00J0,0RG00J1,0RG00JJ,0RG00K0,0RG00K1,0RG00KJ,0RG0370,0RG0371,0RG037J,0RG03A0,0RG03AJ,0RG03J0,0RG03J1,0RG03JJ,0RG03K0,0RG03K1,0RG03KJ,0RG0470,0RG0471,0RG047J,0RG04A0,0RG04AJ,0RG04J0,0RG04J1,0RG04JJ,0RG04K0,0RG04K1,0RG04KJ,0RG1070,0RG1071,0RG107J,0RG10A0,0RG10AJ,0RG10J0,0RG10J1,0RG10JJ,0RG10K0,0RG10K1,0RG10KJ,0RG1370,0RG1371,0RG137J,0RG13A0,0RG13AJ,0RG13J0,0RG13J1,0RG13JJ,0RG13K0,0RG13K1,0RG13KJ,0RG1470,0RG1471,0RG147J,0RG14A0,0RG14AJ,0RG14J0,0RG14J1,0RG14JJ,0RG14K0,0RG14K1,0RG14KJ,0RG2070,0RG2071,0RG207J,0RG20A0,0RG20AJ,0RG20J0,0RG20J1,0RG20JJ,0RG20K0,0RG20K1,0RG20KJ,0RG2370,0RG2371,0RG237J,0RG23A0,0RG23AJ,0RG23J0,0RG23J1,0RG23JJ,0RG23K0,0RG23K1,0RG23KJ,0RG2470,0RG2471,0RG247J,0RG24A0,0RG24AJ,0RG24J0,0RG24J1,0RG24JJ,0RG24K0,0RG24K1,0RG24KJ,0RG4070,0RG4071,0RG407J,0RG40A0,0RG40AJ,0RG40J0,0RG40J1,0RG40JJ,0RG40K0,0RG40K1,0RG40KJ,0RG4370,0RG4371,0RG437J,0RG43A0,0RG43AJ,0RG43J0,0RG43J1,0RG43JJ,0RG43K0,0RG43K1,0RG43KJ,0RG4470,0RG4471,0RG447J,0RG44A0,0RG44AJ,0RG44J0,0RG44J1,0RG44JJ,0RG44K0,0RG44K1,0RG44KJ,0RG6070,0RG6071,0RG607J,0RG60A0,0RG60AJ,0RG60J0,0RG60J1,0RG60JJ,0RG60K0,0RG60K1,0RG60KJ,0RG6370,0RG6371,0RG637J,0RG63A0,0RG63AJ,0RG63J0,0RG63J1,0RG63JJ,0RG63K0,0RG63K1,0RG63KJ,0RG6470,0RG6471,0RG647J,0RG64A0,0RG64AJ,0RG64J0,0RG64J1,0RG64JJ,0RG64K0,0RG64K1,0RG64KJ,0RG7070,0RG7071,0RG707J,0RG70A0,0RG70AJ,0RG70J0,0RG70J1,0RG70JJ,0RG70K0,0RG70K1,0RG70KJ,0RG7370,0RG7371,0RG737J,0RG73A0,0RG73AJ,0RG73J0,0RG73J1,0RG73JJ,0RG73K0,0RG73K1,0RG73KJ,0RG7470,0RG7471,0RG747J,0RG74A0,0RG74AJ,0RG74J0,0RG74J1,0RG74JJ,0RG74K0,0RG74K1,0RG74KJ,0RG8070,0RG8071,0RG807J,0RG80A0,0RG80AJ,0RG80J0,0RG80J1,0RG80JJ,0RG80K0,0RG80K1,0RG80KJ,0RG8370,0RG8371,0RG837J,0RG83A0,0RG83AJ,0RG83J0,0RG83J1,0RG83JJ,0RG83K0,0RG83K1,0RG83KJ,0RG8470,0RG8471,0RG847J,0RG84A0,0RG84AJ,0RG84J0,0RG84J1,0RG84JJ,0RG84K0,0RG84K1,0RG84KJ,0SG0070,0SG0071,0SG007J,0SG00A0,0SG00AJ,0SG00J0,0SG00J1,0SG00JJ,0SG00K0,0SG00K1,0SG00KJ,0SG0370,0SG0371,0SG037J,0SG03A0,0SG03AJ,0SG03J0,0SG03J1,0SG03JJ,0SG03K0,0SG03K1,0SG03KJ,0SG0470,0SG0471,0SG047J,0SG04A0,0SG04AJ,0SG04J0,0SG04J1,0SG04JJ,0SG04K0,0SG04K1,0SG04KJ,0SG1070,0SG1071,0SG107J,0SG10A0,0SG10AJ,0SG10J0,0SG10J1,0SG10JJ,0SG10K0,0SG10K1,0SG10KJ,0SG1370,0SG1371,0SG137J,0SG13A0,0SG13AJ,0SG13J0,0SG13J1,0SG13JJ,0SG13K0,0SG13K1,0SG13KJ,0SG1470,0SG1471,0SG147J,0SG14A0,0SG14AJ,0SG14J0,0SG14J1,0SG14JJ,0SG14K0,0SG14K1,0SG14KJ,0SG3070,0SG3071,0SG307J,0SG30A0,0SG30AJ,0SG30J0,0SG30J1,0SG30JJ,0SG30K0,0SG30K1,0SG30KJ,0SG3370,0SG3371,0SG337J,0SG33A0,0SG33AJ,0SG33J0,0SG33J1,0SG33JJ,0SG33K0,0SG33K1,0SG33KJ,0SG3470,0SG3471,0SG347J,0SG34A0,0SG34AJ,0SG34J0,0SG34J1,0SG34JJ,0SG34K0,0SG34K1,0SG34KJ,0SG5070,0SG5071,0SG507J,0SG50A0,0SG50AJ,0SG50J0,0SG50J1,0SG50JJ,0SG50K0,0SG50K1,0SG50KJ,0SG5370,0SG5371,0SG537J,0SG53A0,0SG53AJ,0SG53J0,0SG53J1,0SG53JJ,0SG53K0,0SG53K1,0SG53KJ,0SG5470,0SG5471,0SG547J,0SG54A0,0SG54AJ,0SG54J0,0SG54J1,0SG54JJ,0SG54K0,0SG54K1,0SG54KJ,0SG6070,0SG6071,0SG607J,0SG60A0,0SG60AJ,0SG60J0,0SG60J1,0SG60JJ,0SG60K0,0SG60K1,0SG60KJ,0SG6370,0SG6371,0SG637J,0SG63A0,0SG63AJ,0SG63J0,0SG63J1,0SG63JJ,0SG63K0,0SG63K1,0SG63KJ,0SG6470,0SG6471,0SG647J,0SG64A0,0SG64AJ,0SG64J0,0SG64J1,0SG64JJ,0SG64K0,0SG64K1,0SG64KJ |
| Corpectomy | 0P540ZZ,0P840ZZ,0PB40ZX,0PB40ZZ,0PC40ZZ,0PD40ZZ,0PH404Z,0PN40ZZ,0PR407Z,0PR40JZ,0PR40KZ,0PU407Z,0PU40JZ,0PU40KZ,0R560ZZ,0RB60ZX,0RB60ZZ,0RC90ZZ,0RG6070,0RG607J,0RG60A0,0RG60AJ,0RG60Z0,0RG60JJ,0RG60K0,0RG60KJ,0RH604Z,0RH608Z,0RR607Z,0RR60JZ,0RR60KZ,XRG6092,XRG60F3,XRG7092,XRG70F3,XRG8092,XRG80F3,0Q500ZZ,0Q800ZZ,0QB00ZX,0QB00ZZ,0QC00ZZ,0QD00ZZ,0QH004Z,0QH005Z,0QN00ZZ,0QR007Z,0QR00JZ,0QR00KZ,0QS004Z,0QS00ZZ,0QS0XZZ,0QU007Z,0QU00JZ,0QU00KZ,0S500ZZ,0SB00ZX,0SB00ZZ,0SC00ZZ,0SG0070,0SG007J,0SG00A0,0SG00AJ,0SG00J0,0SG00JJ,0SG00K0,0SG00KJ,0SH004J,0SH008Z,0SN00ZZ,0SR007Z,0SR00JZ,0SR00KZ,0SU007Z,0SU00JZ,0SU00KZ,0P530ZZ,0P830ZZ,0PB30ZX,0PB30ZZ,0PC30ZZ,0PD30ZZ,0PH304Z,0PN30ZZ,0PR307Z,0PR30JZ,0PR30KZ,0PU307Z,0PU30JZ,0PU30KZ,0R500ZZ,0RB00ZX,0RB00ZZ,0RB10ZX,0RB10ZZ,0RC00ZZ,0RC10ZZ,0RG0070,0RG0071,0RG007J,0RG00A0,0RG00AJ,0RG00J0,0RG00JJ,0RG00K0,0RG00KJ,0RG1070,0RG107J,0RG10A0,0RG10AJ,0RG10J0,0RG10JJ,0RG10K0,0RG10KJ,0RH004Z,0RR007Z,0RR00JZ,0RR00KZ,0RR107Z,0RR10JZ,0RR10KZ,0RU007Z,0RU00ZJ,0RU00KZ,0RU107Z,0RU10JZ,0RU10KZ,XRG0092,XRG00F3,XRG1092,XRG10F3 |
